# Supplementary material
Source: publisher site journal article supplement (https://www.dovepress.com/get_supplementary_file.php?f=290263.docx)
Supplement: Supplementary file 1 [file get_supplementary_file.php]

Supplementary material for

# Synergistic antitumor efficacy mediated by liposomal co-delivery of polymeric micelles of vinorelbine and cisplatin in non-small cell lung cancer

Shuhang Wang1, Jingxin Gou2, Yue Wang1, Xinyi Tan2, Linxuan Zhao1, Xiangqun Jin*1 and Xing Tang2

1Author affiliations: Department of Pharmaceutics, College of Pharmacy Sciences, Jilin University, Changchun 130021, Jilin, P. R. China;

2Author affiliations: Department of Pharmaceutics Science, Shenyang Pharmaceutical University, Shenyang, 110016, P. R. China

Correspondence: Xiangqun Jin

Department of Pharmaceutics, College of Pharmacy Sciences, Jilin University, Changchun 130021, Jilin, China

Tel : +86 431 85619252

Fax : +86 431 85619662

Email : [jinxq@jlu.edu.cn](mailto:jinxq@jlu.edu.cn)

# Material and methods

## Preparation and characterization of liposome-encapsulated CDDP-PMs (CDDP-lip)

2 ml of CDDP-PMs (5 mg·ml−1 CDDP) was the water phase (2 ml). E80/cholesterol /DPPG/DSPE-mPEG2000 at a molar ratio of 52:32:14:2 were dissolved in diethyl ether and chloroform (at a volume ratio of 1:1) as the oil phase (8 ml). The water phase was rapidly injected into the oil phase, followed by sonication for 5 min using a probe-ultrasonic cell disruptor (90 W) (JY-92-II; Xinzhi, Taizhou, China) without emulsion. The organic solvent was removed under reduced pressure at 45°C, yielding a viscous gel that was hydrated in PBS (0.01 M, pH 7.4) with stirring at 55°C for 30 min. The lipid suspension was passed through a 200-nm polycarbonate membrane 20 times using a hand-held LiposoFast basic extruder (Avestin, Ottawa, ON, Canada). Unentrapped micelles were removed by ultra-high speed refrigerated centrifuge (HC-3018R, Zhongke Zhongjia Scientific Instrument Co., Hefei, China) at 16000rpm, for 1h. The liposome concentrates were stored at 4°C.

Particle size, size distribution, and zeta potential of CoNP-lips were evaluated by DLS. CoNP-lips were diluted with a 0.9% saline solution and triplicate measurements were carried out at 25°C. The encapsulation efficiency (EE) and drug loading (DL) were measured and CDDP contents was determined by HPLC. Each measurement was performed in triplicate.

## Preparation and characterization of liposome-encapsulated NVB-PMs (NVB-lip)

2 ml of NVB-PMs (10 mg·ml−1·NVB) was the water phase (2 ml). E80/cholesterol /DPPG/DSPE-mPEG2000 at a molar ratio of 52:32:14:2 were dissolved in diethyl ether and chloroform (at a volume ratio of 1:1) as the oil phase (8 ml). The water phase was rapidly injected into the oil phase, followed by sonication for 5 min using a probe-ultrasonic cell disruptor (90 W) without emulsion. The organic solvent was removed under reduced pressure at 45°C, yielding a viscous gel that was hydrated in PBS (0.01 M, pH 7.4) with stirring at 55°C for 30 min. The lipid suspension was passed through a 200-nm polycarbonate membrane 20 times using a hand-held LiposoFast basic extruder. Unentrapped micelles were removed by ultra-high speed refrigerated centrifuge at 16000rpm, for 1h. The liposome concentrates were stored at 4°C.

Particle size, size distribution, and zeta potential of CoNP-lips were evaluated by DLS. CoNP-lips were diluted with a 0.9% saline solution and triplicate measurements were carried out at 25°C. The EE and DL were measured and NVB contents was determined by HPLC. Each measurement was performed in triplicate.

## Optimization of formulation

Three factors that affected the drug entrapment efficiency (EE), X1 (the amount of cholesterol), X2 (the amount of DPPG) and X3 (the amount of DSPE-mPEG2000) were selected as critical composition affecting encapsulation efficiency of CDDP (Y1) and encapsulation efficiency of NVB (Y2) of CoNP-lips. The Box-Behnken design (BBD) and response surface methodology (RSM) were employed to analyze the three factors. The design scheme was composed of 17 experimental groups selected by three-factor, three-coded level BBD. The ultimate goal of optimization was to obtain CoNP-lips with maximum encapsulation efficiency of CDDP and NVB. The experiment was designed and analyzed by Design-Expert software (Version 8.0.6.1, Stat-Ease Inc., USA). The experimental variables are shown in Supplementary Table 1. The quadratic model is calculated by using multiple regression analysis, and the model is described by the following formula:

where Y is the response, X is a variable, and *a* is a regression coefficient. Analysis of variance (ANOVA) was conducted to identify the statistically significant term of the model. Response surface plots were generated by using this model.

# Results and Discussion

## Preparation and characterization of CDDP-lips and NVB-lips

The data of particle size, size distribution, zeta potential EE and DL of CDDP-lips and NVB-lips was displayed in Supplementary Table 2. There was no significant difference between the single-encapsulated and co-encapsulated liposomes. In this study, the formulations of same lipid composed of were prepared by the same method has similar properties.

## Optimization of formulation

Supplementary Table 3 shows the compositions and the corresponding EE(%)s of CDDP and NVB in CoNP-lips for 17 experimental groups. These experiments were carried out randomly to reduce systematic error. The results of multiple regression analysis are shown inSupplementary Table 4. The following formula was used for this model:

Statistical significance for the regression model was determined by p-value from the F-test. As shown in Supplementary Table 4, quadratic models were the best fitted model for EE of CDDP and EE of NVB, with coefficient of multiple determinations(R2) of 0.9966 and 0.9947, respectively.

To better understand the predictive models, the response surface diagrams in 3D shape are shown in Supplementary Figure 1. The three response surfaces are all downward convex surfaces, and the center of the smallest ellipse in the contour diagram lies in the scope of three levels. This indicates that the maximum response value exists within the range of three levels.

The optimal mass ratio of composition was therefore confirmed to be Lecithin: cholesterol: DPPG: DSPE-mPEG2000, 100: 30: 25: 13.6. The optimal molar ratio of composition was Lecithin: cholesterol: DPPG: DSPE-mPEG2000, 52: 32: 14: 2.

# Tables and Figures

**Supplementary Table 1** Coded and levels of the variables used in Box-Behnken design.

| Factors | Code | Range and levels | | |
| --- | --- | --- | --- | --- |
| -1 | 0 | 1 |
| Cholesterol (mg) | X1 | 20 | 27.5 | 35 |
| DPPG (mg) | X2 | 20 | 27.5 | 35 |
| DSPE-mPEG2000 (mg) | X3 | 10 | 15 | 20 |

**Notes:**The amount of E80 was fixed at 100 mg.

**Supplementary Table 2** Physicochemical characteristics of liposome formulations (n=3)

| **Liposome** | **Particle size, nm** | **PDI** | **Zeta potential, mV** | **EE, %** | **DL, %** |
| --- | --- | --- | --- | --- | --- |
| CDDP-lips | 161.31±3.05 | 0.19±0.012 | −14.87±1.05 | 57.42±1.11 | 3.98±0.49 |
| NVB-lips | 163.18±2.33 | 0.17±0.045 | −14.182±0.22 | 55.21±1.27 | 6.78±0.44 |

**Notes:** Data are presented as mean±SD.

**Abbreviations:** CDDP, cis-diamminedichloroplatinum (II) (cisplatin); DL, drug loading; EE, encapsulation efficiency; NVB, vinorelbine; PDI, polydispersity index.

**Supplementary Table 3** Experimental Box-Behnken design for three factors and experimental EE(%) of CDDP and NVB

| Std | Factors | | | Response | |
| --- | --- | --- | --- | --- | --- |
| X1 (mg) | X2 (mg) | X3 (mg) | Y1 (%) | Y2 (%) |
| 1 | 27.5 | 27.5 | 15 | 57.87 | 53.01 |
| 2 | 27.5 | 27.5 | 15 | 58.01 | 54.23 |
| 3 | 35 | 27.5 | 10 | 48.34 | 45.07 |
| 4 | 35 | 20 | 15 | 42.04 | 41.35 |
| 5 | 20 | 20 | 15 | 34.28 | 32.32 |
| 6 | 35 | 35 | 15 | 29.05 | 24.07 |
| 7 | 27.5 | 20 | 20 | 39.44 | 38.88 |
| 8 | 20 | 35 | 15 | 5.95 | 5.66 |
| 9 | 27.5 | 27.5 | 15 | 56.65 | 52.43 |
| 10 | 27.5 | 35 | 20 | 17.4 | 14.81 |
| 11 | 20 | 27.5 | 20 | 20.32 | 19.13 |
| 12 | 35 | 27.5 | 20 | 44.93 | 43.21 |
| 13 | 27.5 | 35 | 10 | 31.14 | 29.12 |
| 14 | 27.5 | 20 | 10 | 47.22 | 47.37 |
| 15 | 20 | 27.5 | 10 | 34.02 | 32.72 |
| 16 | 27.5 | 27.5 | 15 | 57.24 | 53.73 |
| 17 | 27.5 | 27.5 | 15 | 56.68 | 53.09 |

**Supplementary Table 4** Analysis of variance (ANOVA) in the quadratic model for responses (Y1 and Y2)

| Source | EE of CDDP (Y1) | | | | EE of NVB (Y2) | | | |
| --- | --- | --- | --- | --- | --- | --- | --- | --- |
|  | Sum of Squars | Degree of Freedom | F-value | P-value (Prob > F) | Sum of Squars | Degree of Freedom | F-value | P-value (Prob > F) |
| Model | 3957.66 | 9 | 228.17 | < 0.0001 | 3600.07 | 9 | 146.48 | < 0.0001 |
| X1 | 608.83 | 1 | 315.91 | < 0.0001 | 509.92 | 1 | 186.70 | < 0.0001 |
| X2 | 788.8 | 1 | 409.31 | < 0.0001 | 930.10 | 1 | 340.55 | < 0.0001 |
| X3 | 186.53 | 1 | 96.79 | < 0.0001 | 182.88 | 1 | 66.965 | < 0.0001 |
| X1X2 | 58.83 | 1 | 30.53 | 0.0009 | 22.00 | 1 | 8.054 | 0.0251 |
| X1X3 | 26.47 | 1 | 13.74 | 0.0076 | 34.40 | 1 | 12.595 | 0.0094 |
| X2X3 | 8.88 | 1 | 4.61 | 0.0690 | 8.47 | 1 | 3.105 | 0.1217 |
| X12 | 731.28 | 1 | 379.45 | < 0.0001 | 655.82 | 1 | 240.125 | < 0.0001 |
| X22 | 1116.12 | 1 | 579.13 | < 0.0001 | 943.30 | 1 | 345.385 | < 0.0001 |
| X32 | 218.80 | 1 | 113.53 | < 0.0001 | 140.92 | 1 | 51.60 | 0.0002 |
| Residual | 13.49 | 7 |  |  | 19.11 | 7 |  |  |
| Lack of Fit | 11.85 | 5 | 9.64 | 0.0265 | 17.18 | 3 | 11.84 | 0.0185 |
| Pure Error | 1.64 | 4 |  |  | 1.93 | 4 |  |  |
| Cor Total | 3971.15 | 16 |  |  | 3619.79 | 16 |  |  |

**Notes:** EE of CDDP: R2=0.9966, Adjusted R2=0.9922, Predicted R2=0.9516; EE ofNVB: R2=0.9947, Adjusted R2=0.9879, Predicted R2=0.9232.


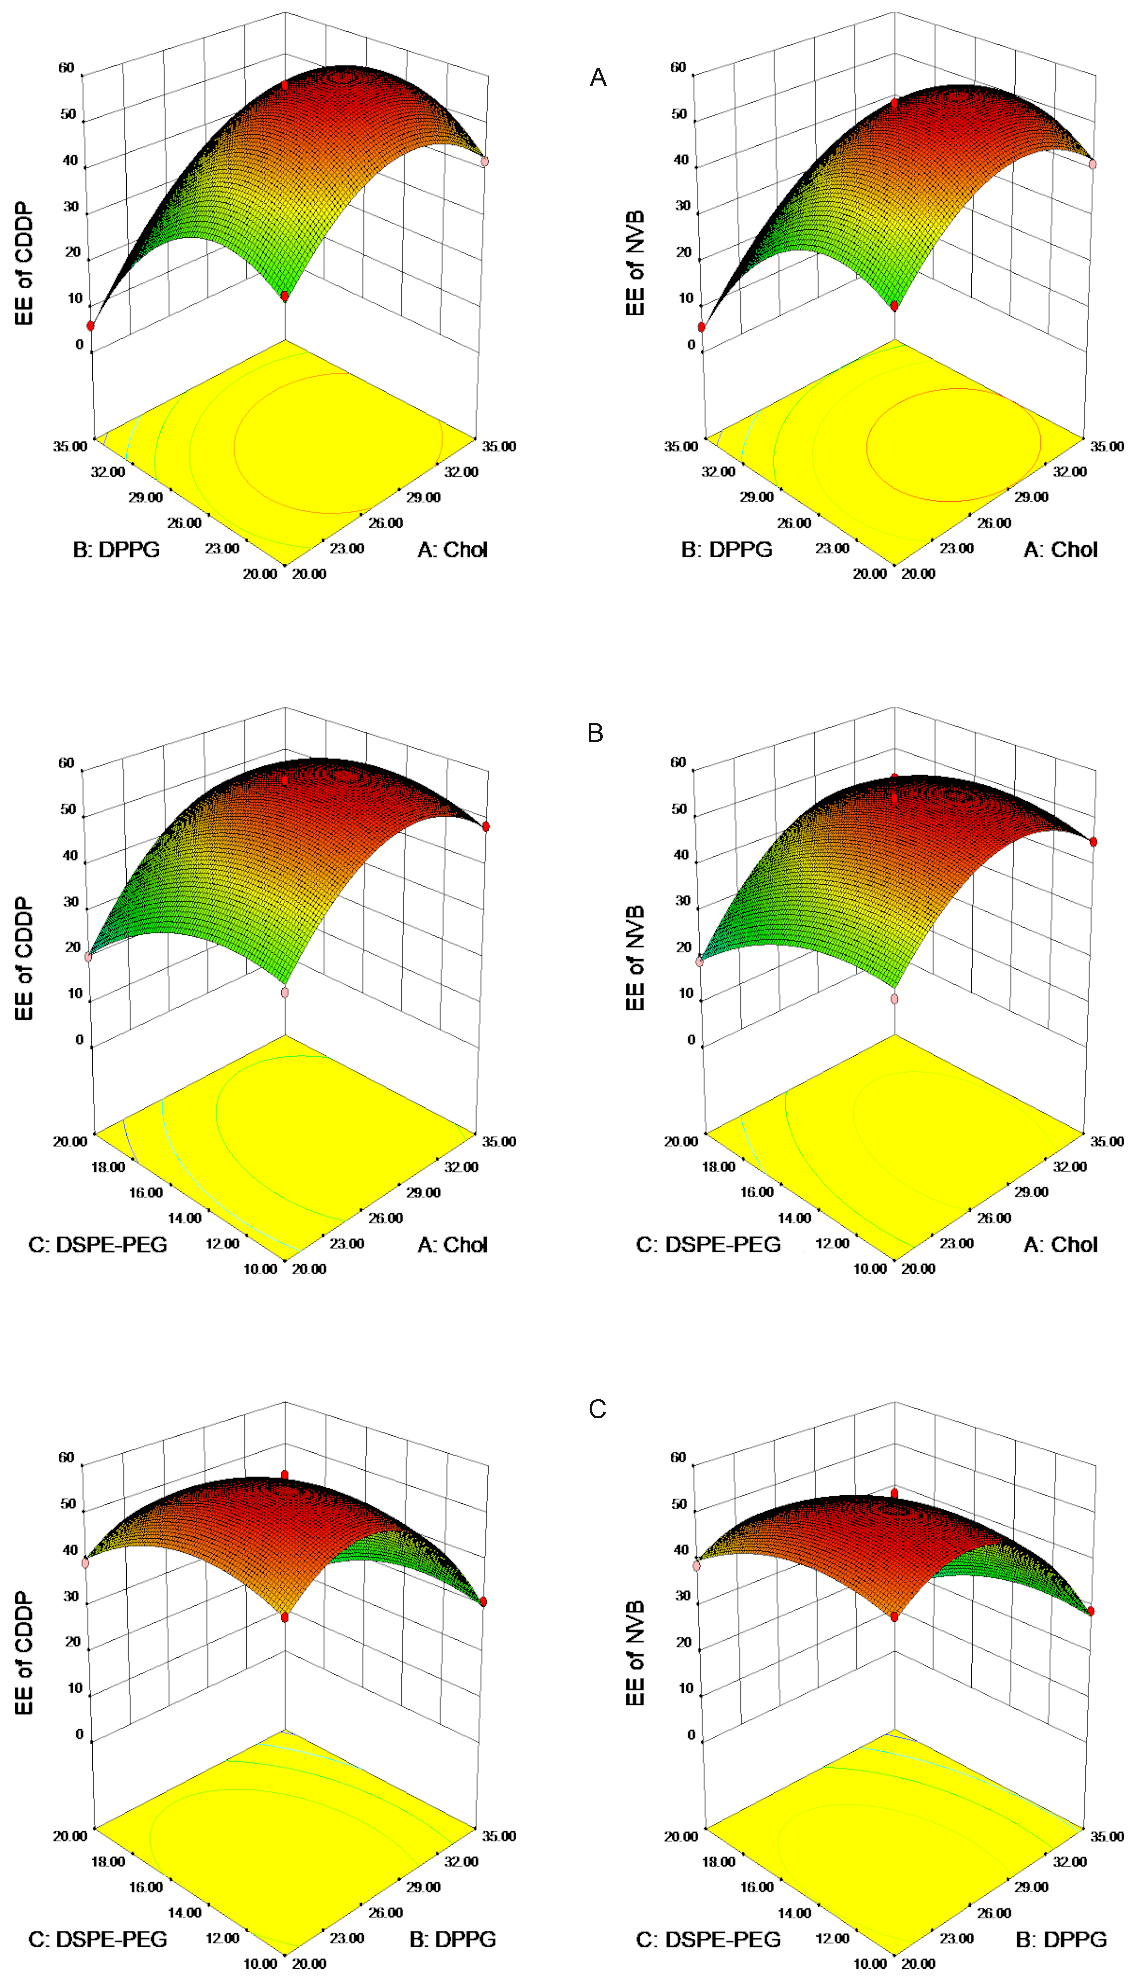


**Supplementary Figure 1.** Response surface plot showing the effect of (A) amount of cholesterol to DPPG, (B) amount of cholesterol to DSPE-PEG2000, and (C) amount of DPPG to DSPE-PEG2000. With the length limit of factors in software，DSPE-PEG2000 is shown as DSPE-PEG.
